# Supplementary material for: Bubble-particle dynamics in multiphase flow of capillary foams in a porous micromodel
Source: Royal Society of Chemistry journal article supplement (doi:10.1039/d3lc00419h), 2023-01-01
Supplement: d3lc00419h5.pdf [file d3lc00419h5.pdf]

## Supplementary Information

### Bubble-particle dynamics in multiphase flow of capillary foams in a porous micromodel

Omotola Okesanjo <sup>a</sup>, Guillaume Aubry <sup>a</sup>, Sven Behrens <sup>ab\*</sup>, Hang Lu <sup>a</sup>, and J. Carson Meredith <sup>a\*</sup>

<sup>a</sup> School of Chemical and Biomolecular Engineering, Georgia Institute of Technology.

<sup>b</sup> Polymer Science & Materials Chemistry, Exponent Inc.

\*Email: hang.lu@chbe.gatech.edu; carson.meredith@chbe.gatech.edu

### Content

File Name: Video S1

Description: **Three stages of foam flow through the microporous environment.**

Three sequences show different states of the foam flowing through the device. Not real speed (slowed down).

File Name: Video S2

Description: **Partial and full clogging remediation**

Foam flowing through a partially clogged micromodel. Full clogging is remediated through pressure build up that forces displacement of bubbles and particles clogging the micromodel. Not real speed (slowed down).

File Name: Video S3

Description: **Water erosion process.**

A current of water sweeps away particles and bubbles trapped in the pores of the micromodel and opens new channels for foam flow. Not real speed (slowed down).

File Name: Video S4

Description: **Flow path reconfiguration.**

Path switching occurs as new flow paths open and the existing paths close. Not real speed (slowed down).

|                                                       |        |
|-------------------------------------------------------|--------|
| SI Figure 1: Experimental set-up .....                | Page 2 |
| SI Figure 2: Phase separation through PE tubing ..... | Page 3 |
| Permeability computation .....                        | Page 3 |

## 1. Experimental set-up

To monitor and quantify the capillary foam's behavior through the microporous environment, the microfluidic device was set under a dissecting scope coupled to a high-speed acquisition camera (Phantom v7, 4000 fps). A syringe pump positioned vertically actuated a syringe loaded with the capillary foam. The foam is transported to the device via PE tubing and, after the device, is collected in a glass beaker.

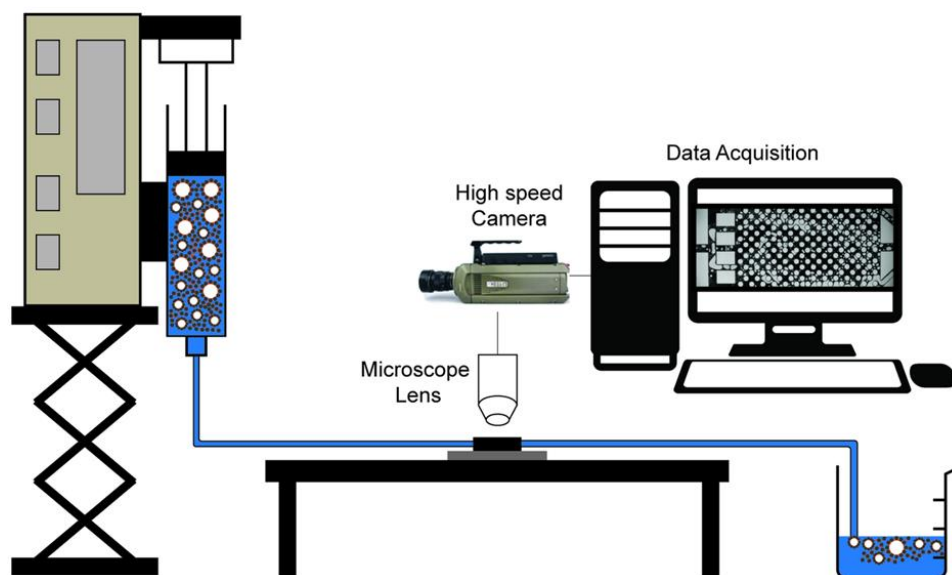

Fig. S1: Apparatus and set-up used to image capillary foam flow.

## 2. Phase separation through PE tubing

At low flow rate, the stress imposed appears to hasten CF aging, leading to CF loss over time. SI Figure 2 shows phase separation as evidenced by the segregated regions of gas plugs, water, and foams in the tube.

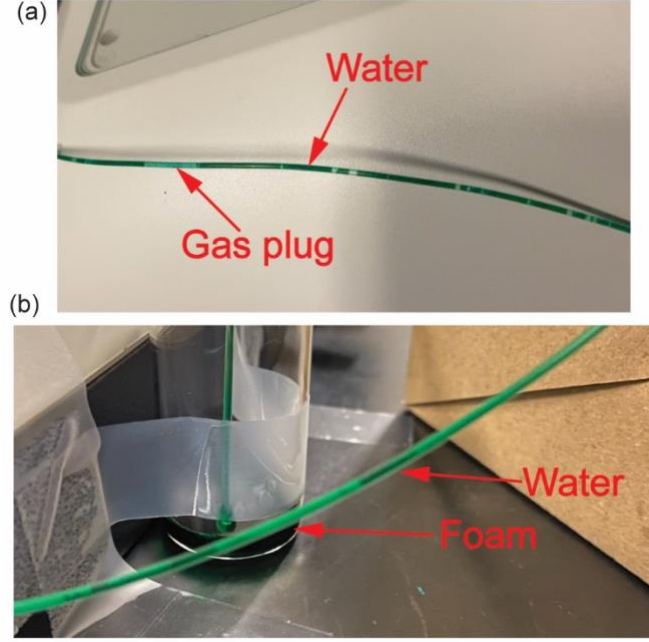

Fig. S2: Images of capillary foams dyed with green food dye flowing through a polyethylene tube showing phase separation between (a) water and gas, (b) foam and water before entering the micromodel.

### 3. Permeability computation

Permeability ( $k$ ) of the porous micromodel used in this work was calculated via the Kozeny-Carman equation in eq. S1 below:

$$k = \Phi^2 \frac{\varepsilon^3 d_p^2}{150 * (1 - \varepsilon)^2} \quad \text{S1}$$

Where,  $d_p = 200\mu m$  is the diameter of the constriction,  $\varepsilon = 0.65$  is the porosity of the micromodel and  $\Phi$  is the constriction sphericity factor; for a circular constriction,  $\Phi = 0.87$ .
